# Supplementary material
Source: Research Square preprint supplement (doi:10.21203/rs.3.rs-9706454/v1)
Supplement: Supplementary file 1 [file 69c50bddec4604ffe157b1f9.docx]

Additional file 1

Supplementary tables and figure legends for: Grip strength, walking pace, and hospital-record-defined incident degenerative cervical myelopathy: a UK Biobank cohort study

This supplementary document accompanies the BMC Neurology submission. Supplementary figures are supplied together as Additional file 2.

Table S1 Endpoint reconstruction and pairing logic

Supplementary endpoint-reconstruction summary derived from the record-level hospital linkage workflow. Main pairing window: -30 to +180 days. Strict sensitivity window: 0 to +90 days.

Panel A. Core endpoint-reconstruction counts

| Metric | Count |
| --- | --- |
| Participants with baseline date | 501,936 |
| Raw DCM diagnosis rows (any position) | 2,380 |
| Participants with DCM diagnosis (any position) | 1,241 |
| Raw DCM diagnosis rows (primary position) | 1,240 |
| Participants with DCM diagnosis (primary position) | 883 |
| Incident DCM participants (any position) | 978 |
| Incident DCM participants (primary-only) | 639 |
| Cervical surgery rows in probe set | 2,941 |
| Participants with probe-set cervical surgery | 2,388 |
| Diagnosis-procedure pair rows (main window) | 855 |
| Participants with diagnosis-procedure pairing (main window) | 742 |
| Incident surgically treated DCM participants (main window) | 552 |
| Diagnosis-procedure pair rows (strict window) | 842 |
| Participants with diagnosis-procedure pairing (strict window) | 734 |
| Incident surgically treated DCM participants (strict window) | 545 |

Panel B. Top cervical surgery OPCS-4 codes contributing to the surgery table

| Top OPCS-4 code | Rows in surgery table |
| --- | --- |
| V29.4 | 1,129 |
| V22.1 | 667 |
| V22.3 | 351 |
| V29.5 | 138 |
| V40.2 | 122 |
| V22.2 | 112 |
| V29.1 | 89 |
| V22.4 | 68 |
| V69.1 | 68 |
| V37.2 | 59 |

Table S2 Covariate completeness and main-model retention

Covariate harmonization and completeness profile of candidate covariates considered for the main analytic model. Variables marked No were not retained in the main analytic model because they were unavailable in the analytic variable set, not recoverable with sufficient reliability, or outside the final model after repair. The main analysis smoking_status_3 field was unavailable in the original analytic variable set. A separate raw baseline smoking variable was recovered for the available-smoking sensitivity model and is reported in Table S4.

| Variable | Source | Non-missing n | Non-missing % | Retained in main analytic model |
| --- | --- | --- | --- | --- |
| Age (per 5 years) | age_at_baseline | 501,936 | 100.00 | Yes |
| Sex | sex | 501,936 | 100.00 | Yes |
| Ethnicity group | ethnicity | 0 | 0.00 | No |
| BMI (per 5 kg/m²) | body mass index | 498,833 | 99.38 | Yes |
| Waist circumference (per 10 cm) | waist circumference | 499,777 | 99.57 | Yes |
| Smoking status 3 | smoking | 0 | 0.00 | No |
| Alcohol | raw alcohol intake frequency | 501,039 | 99.82 | Yes |
| Diabetes | doctor-diagnosed diabetes / age at diabetes diagnosis | 499,322 | 99.48 | Yes |
| Hypertension | hypertension / age at hypertension diagnosis | 501,936 | 100.00 | Yes |
| Grip strength (per 5 kg) | max grip strength | 499,576 | 99.53 | Yes |
| Usual walking pace (per category) | usual walking pace | 499,130 | 99.44 | Yes |
| Falls | falls in the last year | 499,270 | 99.47 | No |
| Frailty | frailty index | 0 | 0.00 | No |
| Available baseline smoking variable | raw baseline smoking categories used for the available-smoking sensitivity model | 492,679 | 98.16 | No; Table S4 only |

Table S3 Enhancement boundary summary

Summary of why the accelerometer and body-composition layers were retained as supplementary boundary context rather than included in the main analysis.

| Enhancement branch | Layer | Key quantities | Reason for not being promoted to the main analysis | Interpretation |
| --- | --- | --- | --- | --- |
| Accelerometer subset | Merged survival + accelerometer subset | 501,936 total; 103,567 with non-missing landmark date; 96,557 eligible after wear and pre-landmark exclusions | No activity variable set reached the predefined minimum modeling threshold | Null / inconclusive enhancement layer |
| Accelerometer subset | Bundle status | All tested activity bundles failed the modeling threshold | No common complete-case landmark modeling cohort | Not promoted to the main analysis |
| Body-composition subset | Timing contract | 102,730 body-composition records; all available measurements occurred after baseline; median baseline-to-measure lag = 4,598 days | Landmark anchoring required | Proceed to subset-contract interpretation only |
| Body-composition subset | Landmark modeling gate | Landmark-eligible participants = 101,806; post-landmark incident DCM events = 25 | No bundle reached the modeling gate | Null / inconclusive enhancement layer |

Both enhancement branches were scientifically informative because they defined the upper boundary of add-on value under time-safe subset contracts, but neither yielded evidence sufficient for inclusion in the main analysis.

Table S4 Post hoc sensitivity analyses for reverse causality and available smoking adjustment

Lagged analyses excluded participants with endpoint occurrence or loss from observation within the first 2 or 5 years and re-anchored follow-up at the corresponding landmark among participants still under observation. The available-smoking model additionally adjusted for baseline smoking status coded as never, previous, or current. All models used the primary endpoint: hospital-record-defined incident DCM (any-position).

| Analysis | Analytic n | Events | Variable | HR (95% CI) | P value |
| --- | --- | --- | --- | --- | --- |
| Original fully adjusted model | 494,527 | 944 | Grip strength (per 5 kg) | 0.845 (0.810-0.881) | 2.52e-15 |
| Original fully adjusted model | 494,527 | 944 | Usual walking pace (per category) | 0.824 (0.785-0.866) | 7.35e-15 |
| Lagged sensitivity excluding first 2 years | 492,053 | 860 | Grip strength (per 5 kg) | 0.860 (0.823-0.899) | 1.63e-11 |
| Lagged sensitivity excluding first 2 years | 492,053 | 860 | Usual walking pace (per category) | 0.828 (0.786-0.872) | 1.34e-12 |
| Lagged sensitivity excluding first 5 years | 485,879 | 715 | Grip strength (per 5 kg) | 0.870 (0.829-0.913) | 2.03e-08 |
| Lagged sensitivity excluding first 5 years | 485,879 | 715 | Usual walking pace (per category) | 0.830 (0.783-0.880) | 3.17e-10 |
| Available-smoking sensitivity model | 492,679 | 935 | Grip strength (per 5 kg) | 0.846 (0.812-0.883) | 6.86e-15 |
| Available-smoking sensitivity model | 492,679 | 935 | Usual walking pace (per category) | 0.830 (0.790-0.873) | 3.38e-13 |

Supplementary figure legends

Figure S1 Endpoint reconstruction and cervical surgery code spectrum. Supplementary view of the diagnosis-procedure pairing framework used to define the primary and surgery-related endpoints. These supplementary data support the endpoint-construction logic but are not themselves treated as primary manuscript results.

Figure S2 Covariate completeness and main-model retention. Non-missingness of candidate covariates after covariate harmonization. Variables retained in the main analytic model are highlighted. The smoking_status_3 field was unavailable in the original analytic variable set; a separate raw baseline smoking variable was recovered for the available-smoking sensitivity model reported in Table S4.

Figure S3 Accelerometer subset boundary. Objective activity was evaluated as an enhancement layer, but no activity bundle reached the modeling threshold after time-safe subset construction.

Figure S4 Body-composition subset boundary. Body-composition measurements required landmark anchoring and did not yield a bundle that reached the modeling gate after time-safe anchoring.
